# Supplementary material for: Intermittent horizontal mattress suture in proximal anastomosis for acute type A aortic dissection: a retrospective study
Source: PeerJ. 2025 Mar 26;13:e19159. doi: 10.7717/peerj.19159 (PMC11954457; doi:10.7717/peerj.19159)
Supplement: Supplemental Information 5 [file peerj-13-19159-s005.xlsx]

## Sheet: Data
No.	Age - years	Male	Hospital stay time - d	Ventilation - h	Body mass index - kg/m2	Diabetes mellitus	Hypertension	Cerebral disease history	Normal white blood cell	Anemia	Prothrombin time - s	Platelet＜100×109/L	Elevated INR	Hypoproteinaemia	Elevated triglyceride	Elevated total cholesterol	Elevated creatinine	Left ventricle ejection fractions ＜50%	Aortic valve regurgitation	Transient ischemic attack	Brachiocephalic trunk	Left common carotid artery	Left subclavian artery	Celiac trunk artery	Mesenteric artery	Renal artery	Lower extremity arteries	Pericardial tamponade	CPB time - min	ACC time - min	CA time - min	PA time*- min	Spontaneous heartbeat recovery	Circulation assistance time - min	Red blood cell transfusion - U	Autologous transfusion - mL	Intraoperative urine volume - mL	Intraoperative blood loss -L	First day drainage - mL	Re-exploration for bleeding	Delirium time - d	Length of ICU stay - d	Paraplegia	Stroke	Renal failure	Pulmonary infection	Liver failure	Septicemia	Gastrointestinal bleeding
1	44	1	23	65	24.6	0	1	0	0	1	13.8	0	0	0	0	0	0	0	0	0	0	0	0	0	0	0	0	0	122	69	30	56	0	45	1.5	0	400	800	250	0	5	11	0	0	0	0	0	0	0
2	48	1	40	160	24.5	0	1	0	1	0	20.3	1	1	0	0	0	1	0	0	0	0	0	0	0	0	0	0	1	180	110	32	30	0	40	3	0	800	1200	630	0	14	28	0	0	1	0	0	0	0
3	61	1	24	16	24.8	0	1	1	1	0	13.5	0	0	0	0	0	0	0	1	1	1	1	0	1	1	1	1	1	208	119	33	35	1	82	6	0	1500	2000	405	0	6	8	0	0	0	0	0	0	0
4	64	1	17	21	20.8	0	1	0	0	1	15	0	0	1	0	0	0	0	0	0	0	0	1	1	1	1	0	0	200	116	34	41	1	77	0	500	400	800	425	0	7	9	0	0	0	0	0	0	0
5	57	0	18	22	26.7	0	1	0	0	0	13.4	0	0	0	0	0	0	0	0	0	0	0	0	0	0	0	0	0	185	114	35	33	0	65	0	500	1000	2000	220	0	4	6	0	0	0	0	0	0	0
6	60	0	17	81	23.7	0	1	0	1	0	13.5	0	0	0	0	0	0	0	0	0	0	0	0	0	0	1	0	0	185	106	40	32	1	70	0	750	400	800	350	0	11	9	0	0	0	0	0	0	0
7	52	1	20	57	27.7	0	1	0	0	0	13.3	0	0	0	0	0	0	0	0	0	0	0	0	0	0	0	0	0	190	102	28	30	0	60	0	300	800	600	475	0	9	13	0	0	0	0	0	0	0
8	45	1	26	50	27.7	1	1	0	1	0	13.3	0	0	0	0	0	0	0	0	0	0	0	0	0	1	1	0	0	138	133	39	28	0	50	0	260	1000	500	1900	1	3	7	0	0	0	0	0	0	0
9	55	1	19	15	29.8	0	1	0	1	0	14.6	0	0	0	0	0	0	0	0	0	0	0	0	0	0	0	0	0	182	105	13	32	0	61	0	320	1200	800	255	0	5	6	0	0	0	0	0	0	0
10	40	0	16	19	16.4	0	0	0	0	1	13.6	0	0	1	0	0	0	0	0	0	1	0	0	0	0	0	0	0	214	113	45	47	0	100	0	260	1000	450	365	0	3	5	0	0	0	0	0	0	0
11	61	0	12	18	23.4	0	1	0	0	1	44	0	1	0	0	0	0	0	0	0	0	0	0	0	0	1	0	0	170	92	39	17	1	66	6	250	500	2000	50	0	4	6	0	0	0	0	0	0	0
12	40	1	13	12	22.9	0	0	0	1	0	12.7	0	0	0	0	0	0	0	0	0	1	1	1	1	1	1	0	0	217	135	35	49	1	72	0	750	1000	800	375	0	2	4	0	0	0	0	0	0	0
13	39	1	31	445	25.2	0	1	0	1	0	12.9	0	0	0	1	0	1	0	0	0	0	0	0	0	0	0	0	0	220	146	42	14	1	68	0	530	500	500	300	0	6	30	0	0	1	0	0	0	0
14	16	1	31	17	19.7	0	1	0	1	0	13.4	0	0	0	0	0	1	0	0	0	0	0	0	0	0	0	0	0	220	143	38	34	1	70	0	500	1200	600	225	0	3	5	0	0	0	0	0	0	0
15	43	1	19	12	29.5	0	0	0	1	0	10.2	0	0	0	0	1	0	0	0	0	0	0	0	0	0	1	0	0	286	146	46	53	0	60	2	1001	2000	1100	215	0	0	5	0	0	0	0	0	0	0
16	62	1	25	490	24.9	0	0	0	0	1	15.8	0	0	1	0	0	0	0	1	0	0	0	0	0	0	0	0	0	188	103	35	28	0	77	1	500	1800	500	325	0	4	24	0	0	0	0	0	1	1
17	41	1	28	48	23.6	0	1	0	1	1	13.2	0	0	0	0	0	0	0	1	0	0	0	0	0	0	1	0	0	260	136	40	43	0	117	0	0	1200	600	200	0	1	11	0	0	0	0	0	0	0
18	39	1	19	25	30.1	0	1	0	1	0	13.4	0	0	0	0	0	0	0	0	0	0	0	0	0	0	0	0	0	173	121	43	30	0	45	0	525	800	600	175	0	12	6	0	0	0	0	0	0	0
19	62	1	19	52	25.1	0	1	0	0	1	14.4	0	0	0	0	0	0	0	0	0	0	0	0	0	0	0	0	0	280	130	32	34	0	160	2	0	1000	800	250	0	0	5	0	0	0	0	0	0	0
20	46	1	13	40	22.2	0	1	0	0	1	13.6	0	0	0	1	0	0	0	0	0	0	0	0	0	0	0	0	0	183	96	31	21	1	65	0	264	1000	400	875	0	3	6	0	0	0	0	0	0	0
21	55	0	16	18	21.6	0	1	0	0	1	14.4	0	0	1	1	0	1	0	0	0	0	0	0	0	0	0	0	0	160	105	42	24	0	50	0	80	1800	1500	375	0	2	4	0	0	0	0	0	0	0
22	40	1	11	73	28.4	0	1	0	1	1	15.3	0	0	0	0	0	1	0	0	0	0	0	0	1	0	0	0	0	178	122	38	41	1	44	0	925	100	500	210	0	6	11	0	0	0	0	0	0	0
23	61	1	24	51	21.5	0	1	0	0	1	13.9	0	0	0	0	0	0	0	0	0	0	0	0	0	0	0	0	0	250	103	36	39	0	130	3	500	300	1500	225	0	0	3	0	0	0	0	0	0	0
24	55	0	27	22	27.1	0	1	0	0	0	12.5	0	0	0	1	0	0	0	0	0	0	0	0	0	0	0	0	0	212	137	41	36	0	68	0	500	1500	1000	550	0	0	5	0	0	0	0	0	0	0
25	41	1	24	84	30.4	0	1	0	1	0	13.2	0	0	0	0	0	0	0	1	0	0	0	0	0	1	1	0	0	333	145	39	63	0	185	4	1000	1100	1200	305	0	6	12	0	0	0	0	0	0	0
26	45	1	18	74	26.8	0	1	0	1	0	13.4	0	0	0	1	0	0	0	0	1	1	1	0	0	1	0	0	0	175	108	35	38	0	62	0	0	1600	400	135	0	0	9	0	0	0	0	0	0	0
27	70	0	19	32	21.6	0	1	0	0	1	11	0	0	1	0	0	0	0	1	1	0	0	0	0	0	0	0	0	240	112	30	60	1	114	0	496	1800	800	160	0	4	7	0	0	0	1	0	0	0
28	41	0	13	14	24.7	0	1	0	1	0	12.4	0	0	0	0	0	0	0	0	0	1	0	0	0	0	0	0	0	270	64	31	40	1	166	0	500	400	2000	415	0	3	4	0	0	0	1	0	0	0
29	50	0	20	28	21.6	0	1	1	1	0	13.7	0	0	0	0	1	0	0	0	1	0	0	0	0	1	0	0	0	220	122	30	29	0	45	0	525	600	1000	800	0	7	10	0	0	0	1	0	0	0
30	53	1	20	132	26.1	0	1	0	1	0	12.8	0	0	0	0	0	0	0	0	0	0	0	0	0	0	0	0	0	151	95	32	38	1	40	0	70	1600	1500	850	0	0	11	0	0	0	1	0	0	0
31	55	0	15	134	33.3	0	1	1	1	0	15	0	0	0	1	0	0	0	1	0	0	0	0	1	0	0	0	0	230	101	39	31	0	124	2	535	1200	1000	145	0	9	15	0	1	0	1	0	0	0
32	45	1	3	56	32	0	1	0	1	1	18.9	0	1	1	0	0	1	1	0	0	1	0	0	1	1	1	1	1	200	120	43	44	0	62	3.5	775	100	2000	1600	0	0	3	0	0	0	0	0	0	0
33	42	1	10	16	20.3	0	0	0	0	0	14.4	0	0	0	0	0	0	0	0	0	1	0	0	0	0	0	0	0	200	132	30	31	0	75	4	1000	2200	1200	145	0	1	3	0	0	0	0	0	0	0
34	48	0	32	86	29.4	0	1	0	1	1	22.5	1	1	1	0	0	0	1	0	0	0	0	0	1	1	1	0	0	250	126	42	30	0	115	0	500	800	1000	250	0	0	4	0	0	0	1	0	0	0
35	53	1	19	12	28	0	1	0	1	1	14.5	0	0	0	0	0	0	0	0	0	0	0	0	0	0	0	0	0	230	151	33	25	0	70	0	250	450	500	575	0	0	6	0	0	0	1	0	0	0
36	49	1	49	69	24.7	0	1	0	0	1	15.6	0	0	1	0	0	1	0	1	0	0	0	0	0	0	0	0	0	172	110	39	31	1	57	0	500	420	700	200	0	13	6	0	0	0	1	0	0	0
37	70	0	18	32	32	0	1	0	1	0	14.5	0	0	0	0	0	0	0	1	0	0	0	1	0	0	0	0	0	190	136	38	36	1	91	2	500	900	1000	400	0	1	4	0	0	0	1	0	0	0
38	66	0	28	481	24.2	0	1	0	1	0	13.2	0	0	0	0	0	0	0	0	1	0	0	0	0	1	1	0	0	206	117	38	39	0	73	0	0	1000	600	575	0	5	28	0	1	0	1	0	0	0
39	43	1	18	401	23.9	0	1	1	0	0	13.3	0	0	0	0	0	1	0	0	1	0	0	0	0	1	1	0	0	185	112	39	50	1	59	4	750	800	2000	525	0	3	18	0	1	0	1	0	0	1
40	57	1	23	117	28.3	0	1	0	1	0	14.5	0	0	0	0	0	0	0	0	0	1	0	0	0	1	1	0	0	93	101	34	23	0	80	0	1000	400	2000	335	0	0	8	0	0	0	1	0	0	0
41	47	1	16	12	29.8	0	1	0	1	0	14.1	0	0	1	1	0	0	0	0	0	0	0	0	0	0	1	0	0	204	106	31	56	1	78	0	0	100	500	500	0	3	5	0	0	0	1	0	0	0
42	52	1	14	14	25.2	0	1	0	1	1	19.8	1	1	0	0	0	1	1	0	0	0	0	0	0	0	0	0	0	181	98	30	45	1	65	2	750	1700	1000	550	0	1	3	0	0	0	0	0	0	0
43	48	1	13	32	26.1	0	0	0	1	0	14.1	0	0	0	0	0	0	0	0	0	1	0	0	1	1	0	1	1	257	141	35	41	1	105	0	1300	2400	2500	35	0	2	7	0	0	0	1	0	0	0
44	39	1	17	48	26	0	0	0	1	0	15.1	0	0	1	0	0	0	1	0	0	0	0	0	0	0	0	0	0	210	117	40	43	0	83	0	1050	2500	2000	375	0	1	4	0	0	0	1	0	0	0
45	41	1	24	153	21.5	0	1	0	1	0	15	0	0	0	0	0	1	0	0	0	0	0	0	0	0	0	0	0	217	148	44	62	1	63	4.5	750	2400	9000	225	0	1	3	0	0	0	1	0	0	0
46	47	1	15	77	21.7	0	1	0	0	1	13.6	0	0	0	0	0	1	0	0	0	0	0	0	0	0	0	0	0	250	146	30	70	1	98	0	260	10	1000	1025	0	10	8	0	0	0	0	0	0	0
47	49	1	15	60	22.3	0	1	1	1	0	12.9	0	0	0	0	0	1	1	0	1	0	0	0	0	0	0	0	0	186	117	41	32	0	54	0	500	100	1100	550	0	5	8	0	1	0	1	0	0	0
48	48	1	24	145	22.9	0	1	0	1	0	13.8	0	0	0	0	0	0	0	0	0	0	0	0	0	0	0	0	0	195	66	16	42	1	120	0	250	900	1100	150	0	14	12	0	0	0	0	0	0	0
49	34	1	29	24	23.1	0	1	0	0	0	13.6	0	0	0	0	0	0	0	0	0	0	0	0	0	0	0	0	0	214	81	21	38	0	89	4	200	1200	2000	75	0	3	4	0	0	0	0	0	0	0
50	36	1	20	48	23.6	0	1	0	1	0	13.1	0	0	0	0	0	0	0	0	0	0	0	0	1	0	0	0	0	223	136	41	44	1	81	6	200	2000	3000	250	0	3	5	0	0	0	0	0	0	0
51	44	1	19	40	25.2	0	0	0	1	0	14.2	0	0	0	0	0	0	0	0	0	0	0	0	0	0	0	0	0	210	106	29	31	1	101	0	500	1800	600	475	0	1	8	0	0	0	0	0	0	0
52	34	1	95	27	26	0	1	0	1	0	14.6	0	0	0	1	0	0	0	0	0	0	0	0	1	0	1	0	0	230	110	30	42	1	98	0	0	100	800	565	0	1	10	1	0	0	1	0	1	1
53	35	1	13	297	26	0	1	0	0	0	14.3	0	0	0	1	0	1	1	0	0	0	0	0	1	1	0	0	0	242	91	23	39	1	145	2	1000	1800	1500	740	0	4	11	0	1	0	1	0	0	0
54	40	1	15	32	26	0	1	0	0	1	10.9	0	0	1	0	0	0	0	0	0	0	0	0	0	0	0	0	0	240	120	36	70	0	117	3	500	2000	2000	135	0	2	4	0	0	1	1	1	0	0
55	46	1	42	70	26	0	1	0	1	0	28	0	1	0	0	0	0	0	0	0	0	0	0	1	1	1	0	0	273	107	27	40	1	145	0	200	100	600	325	0	15	18	0	0	0	0	0	0	0
56	33	1	33	35	26.3	0	1	0	1	0	13.6	0	0	0	0	0	0	0	0	0	0	0	0	0	0	0	1	0	167	101	36	30	1	59	1.5	750	1400	2000	120	0	0	3	0	0	0	1	0	0	0
57	42	1	32	114	27.2	0	1	0	1	1	15.3	0	0	0	0	0	0	0	0	0	0	0	0	0	0	0	0	0	197	132	41	35	1	57	0	0	1200	500	525	0	0	7	0	0	0	0	0	0	0
58	45	1	15	127	27.5	0	1	0	1	0	12.8	0	0	0	0	0	0	0	0	0	0	0	0	0	0	0	0	0	208	107	28	42	1	95	4	750	1200	3000	545	0	3	8	0	0	1	0	0	0	0
59	49	1	45	318	27.7	0	1	1	1	0	14.1	1	0	0	1	1	0	0	0	0	0	0	0	0	0	0	0	0	224	121	46	52	1	99	6	1000	400	9000	250	0	12	22	0	0	0	0	0	0	0
60	32	1	35	524	28.7	0	0	0	1	0	13.6	0	0	0	0	0	0	0	0	1	0	0	0	1	1	0	0	0	197	110	33	31	1	80	4	300	2500	1000	150	0	10	35	0	1	0	1	0	0	1
61	39	1	61	295	28.7	0	1	0	1	0	14.1	0	0	0	0	1	0	0	1	0	0	0	0	1	0	1	1	0	327	185	44	65	1	126	19.5	1250	1200	8000	870	0	6	29	0	0	0	1	0	0	0
62	42	1	44	115	29.1	0	1	0	0	0	14.5	0	0	0	1	0	1	0	1	0	0	0	0	0	0	0	0	0	205	126	25	58	1	76	5	500	1700	1300	0	0	1	7	0	0	0	1	0	0	0
63	39	1	27	250	29.9	0	1	0	1	0	13.6	0	0	0	1	0	0	0	0	1	0	0	0	0	0	0	0	0	197	101	36	41	0	76	0	500	1400	1000	70	0	15	27	0	0	0	1	0	0	0
64	41	1	28	143	34.7	0	1	0	1	1	10.7	0	0	1	0	0	0	0	1	1	1	1	0	1	0	1	0	0	302	105	33	36	1	192	0	0	500	500	407	0	2	18	0	0	0	0	0	0	0
65	32	1	20	151	36.3	0	0	0	1	0	13.3	0	0	0	0	0	0	0	0	0	1	0	0	1	0	1	0	0	250	120	35	41	1	95	0	1000	200	2300	210	0	15	18	0	0	0	0	0	0	0
66	45	1	24	416	37.1	0	0	0	0	0	14.1	1	0	1	1	0	0	0	0	0	0	0	0	0	0	0	0	0	231	119	32	39	1	86	0	532	1800	1500	925	0	11	24	0	0	0	1	0	0	0
67	57	0	42	63	18.4	0	1	0	1	1	14	0	0	0	0	0	0	0	1	0	0	0	0	0	0	1	0	0	188	111	35	29	0	70	4	750	100	2000	225	0	7	10	0	0	0	0	0	0	0
68	56	0	29	21	22.4	1	1	0	1	0	15.6	0	0	0	0	0	0	0	0	0	0	0	0	0	0	1	0	0	235	129	36	35	1	87	0	500	10000	1200	280	0	8	10	0	0	0	0	0	0	0
69	55	0	35	28	23.4	0	1	0	1	1	13.8	1	0	1	0	0	0	0	1	0	0	0	0	0	0	0	0	0	200	105	32	41	1	89	7	800	1500	2000	775	0	1	9	0	0	0	0	0	0	0
70	55	0	21	73	24	0	1	0	1	1	15.1	1	0	0	0	0	0	0	1	0	0	0	0	0	0	0	0	0	190	124	35	31	1	63	4	1000	1900	8000	95	0	4	8	0	0	1	0	0	0	0
71	51	0	20	78	25.6	0	1	0	1	1	13.7	0	0	0	0	0	0	0	0	0	1	1	1	0	0	0	0	0	196	101	31	33	1	87	8	1000	1000	9000	10	0	2	6	0	0	0	0	0	0	0
72	63	0	7	72	20.8	0	1	0	1	0	16.5	0	0	0	0	0	0	0	0	0	1	0	0	1	0	0	0	1	298	131	35	55	1	121	14	500	1300	5000	305	0	6	6	0	0	0	0	0	0	0
73	59	1	30	659	26	0	1	0	1	0	13.9	0	0	0	0	0	0	0	0	0	0	0	0	0	0	1	0	0	217	105	29	39	0	105	0	1050	1600	1700	475	0	16	30	0	0	0	1	0	0	1
74	51	1	16	26	26.7	0	1	0	1	0	12.2	0	0	0	1	0	0	0	0	0	0	0	0	0	0	0	0	0	168	117	34	35	0	44	0	0	1200	500	550	0	5	7	0	0	0	0	0	0	0
75	54	1	18	30	26.7	0	1	0	1	0	15	0	0	0	0	0	0	0	0	0	0	0	0	0	0	0	0	0	188	110	23	40	1	71	0	753	1500	1000	650	0	4	4	0	1	0	0	0	0	0
76	55	1	38	126	27.4	0	0	0	1	0	14.2	1	0	0	1	0	1	0	0	0	0	0	0	0	0	0	0	0	245	134	29	71	0	97	0	0	1200	400	575	0	9	11	0	0	0	0	0	0	0
77	50	1	14	31	28.3	0	1	0	1	0	14	0	0	0	0	0	0	0	0	0	0	0	0	1	1	1	0	0	189	125	37	35	1	67	1.5	750	1300	1500	525	0	3	4	0	0	0	0	0	0	0
78	53	1	37	54	29.1	0	1	1	1	1	14.2	1	0	0	0	0	1	0	0	1	0	0	0	0	0	0	0	0	189	127	41	36	1	53	7.5	750	500	2000	240	0	6	10	0	0	0	1	0	0	0
79	62	0	15	84	18.8	0	1	0	1	1	13.8	0	0	0	0	0	0	0	0	0	0	0	0	0	0	1	0	0	213	96	23	38	0	110	8	1000	1500	8500	800	0	1	15	0	0	0	1	0	0	0
80	63	0	31	60	19.1	0	1	0	1	1	16	0	0	0	1	0	0	0	0	0	1	0	1	0	0	1	0	0	233	150	44	54	1	75	0	100	800	600	230	0	9	4	0	0	0	1	0	0	0
81	60	0	15	16	21	0	1	0	0	1	13	0	0	0	0	0	0	0	0	0	0	0	0	0	0	0	0	0	200	80	34	34	1	116	0	500	1600	800	105	0	3	5	0	0	0	0	0	0	0
82	64	0	20	14	27.5	0	0	0	0	0	14.8	0	1	0	0	0	0	0	1	0	0	0	0	0	0	0	0	0	145	104	28	52	1	106	1.5	200	750	800	850	0	6	8	0	0	0	1	0	0	0
83	66	1	45	64	20.8	0	1	0	0	0	14.1	0	0	1	0	0	0	0	0	0	0	0	0	0	0	0	0	0	212	95	20	40	1	110	0	600	1100	1000	50	0	10	10	0	0	0	0	0	0	0
84	70	1	23	91	21.3	0	1	0	1	0	11.7	0	0	0	0	0	0	0	0	0	0	0	0	0	0	0	0	0	250	114	38	52	1	129	10	500	1300	4000	600	0	5	6	0	0	0	1	0	0	0
85	63	1	8	36	25.1	0	0	0	0	0	14	0	0	0	0	0	1	0	0	0	0	0	0	0	1	1	0	0	207	101	29	39	1	101	0	750	800	2000	400	0	3	3	0	0	0	0	0	0	0
86	60	1	26	40	28.9	0	1	0	0	1	15.6	0	0	1	0	0	1	0	0	1	0	0	0	0	0	0	0	1	213	114	29	35	1	88	6	750	1500	2000	1015	1	1	6	0	0	0	0	0	0	0
87	61	1	4	55	24.2	0	1	0	1	0	15.1	0	0	0	0	0	0	0	0	1	0	0	0	0	0	0	0	0	202	141	49	40	1	55	0	200	1500	500	75	0	2	4	0	0	0	0	0	0	0
88	45	0	59	149	24.5	0	1	0	1	1	16.6	0	0	0	0	0	0	0	0	0	0	0	0	0	0	1	0	0	221	157	50	55	1	111	0	250	850	600	685	0	7	7	0	0	0	0	0	0	0
[truncated: 7 more columns]
